# Supplementary material for: Chiral Ru(ii) complexes act as a potential non-viral gene carrier for directional transportation to the nucleus and cytoplasm
Source: Royal Society of Chemistry journal article supplement (doi:10.1039/c9mt00192a), 2020-01-06
Supplement: c9mt00192a1.pdf [file c9mt00192a1.pdf]

# Chiral Ru(II) Complexes Act as A Potential Non-viral Gene Carrier for Directional Transportation to the Nucleus and Cytoplasm

Qiong Wu,<sup>a</sup> Shuang-Yan Zhang,<sup>b</sup> Si-Yan Liao,<sup>c</sup> Jie-Qiong Cao,<sup>d</sup> Wen-Jie Zheng,<sup>\*a,d</sup> Li Li,<sup>b</sup> Wen-Jie Mei<sup>\*b</sup>

*a. Integrated Chinese and Western Medicine Postdoctoral research station, Jinan University, Guangzhou 510632, China*

*b. School of Pharmacy, Guangdong Pharmaceutical University, Guangzhou, 510006, China.*

*c. School of Pharmaceutical Sciences, Guangzhou Medical University, Guangzhou, 510180, China.*

*d. College of life science and technology, Jinan University, Guangzhou 510632, China.*

*\* To whom correspondence should be addressed.*

*Email: wenjiemei@126.com. tzhwj@jnu.edu.cn*

## 1. Materials and Methods

### Synthesis of $\Lambda$ -[Ru(bpy)<sub>2</sub>(*p*-BrPIP)](ClO<sub>4</sub>)<sub>2</sub>

$\Lambda$ -[Ru(bpy)<sub>2</sub>(*p*-BrPIP)](ClO<sub>4</sub>)<sub>2</sub> was synthesized following the literature<sup>3a, 13b</sup>, but with some modifications. A mixture of [Ru(bpy)<sub>2</sub>(py)<sub>2</sub>][*O,O'*-dibenzoyl-*L*-tartrate]•12H<sub>2</sub>O (520 mg, 0.4 mmol), *p*-BrPIP (225 mg, 0.6 mmol), and ethylene glycol (54 mL) was refluxed for 8 h under argon. The cooled reaction mixture was diluted with water. Saturated aqueous ammonium sodium perchlorate solution was added under vigorous stirring, and filtered. The dark red solid was collected and washed with small amounts of water and diethyl ether, then dried under vacuum, and purified using Al<sub>2</sub>O<sub>3</sub> column chromatography on alumina with acetonitrile/toluene (2:1 v/v) as eluent. The solvent was removed under reduced pressure and red microcrystals were obtained; yield: 73.1%.

### Synthesis of $\Delta$ -[Ru(bpy)<sub>2</sub>(*p*-BrPIP)](ClO<sub>4</sub>)<sub>2</sub>

$\Delta$ -[Ru(bpy)<sub>2</sub>(*p*-BrPIP)](ClO<sub>4</sub>)<sub>2</sub> was prepared using the method described above, but with [Ru(bpy)<sub>2</sub>(py)<sub>2</sub>][*O,O'*-dibenzoyl-*D*-tartrate]•12H<sub>2</sub>O (520 mg, 0.4 mmol) instead of [Ru(bpy)<sub>2</sub>(py)<sub>2</sub>][*O,O'*-dibenzoyl-*L*-tartrate]. The yield was 71.4%.

### Synthesis of $\Lambda$ -[Ru(bpy)<sub>2</sub>(*p*-PBE)](ClO<sub>4</sub>)<sub>2</sub> ( $\Lambda$ -RM0627)

$\Lambda$ -RM0627 was synthesized following the literature<sup>15</sup>, but with some modifications. In general,  $\Lambda$ -[Ru(bpy)<sub>2</sub>(*p*-BrPIP)](ClO<sub>4</sub>)<sub>2</sub> (130 mg, 0.125 mmol) and phenylacetylene (0.09 mL, 0.625 mmol) were dissolved in dry CH<sub>3</sub>CN (15.0 mL), Pd(PPh<sub>3</sub>)<sub>2</sub>Cl<sub>2</sub> (3.5 mg, 0.005 mmol), CuI (2 mg, 0.010 mmol), and dry Et<sub>3</sub>N (0.02 mL) were then added under N<sub>2</sub> atmosphere. The reaction mixture was irradiated with microwaves for 30

min at 140 °C. After filtration and evaporation of the solvent, the residue was purified using flash Al<sub>2</sub>O<sub>3</sub> column chromatography with CH<sub>3</sub>CN as eluent, yield, 48.2%. Calculated for C<sub>49</sub>H<sub>41</sub>Cl<sub>2</sub>N<sub>9</sub>O<sub>11</sub>Ru (%): C, 53.32; H, 3.74; Cl, 6.42; N, 11.42; (Found (%): C 54.0, H 3.4, N 10.8). ESI-MS (in CH<sub>3</sub>CN, *m/z*): 809.3 ([M–2ClO<sub>4</sub>–H]<sup>+</sup>), 405.3 ([M–2ClO<sub>4</sub>]<sup>2+</sup>). UV–vis [ $\lambda$  (nm),  $\epsilon$  (M<sup>-1</sup> cm<sup>-1</sup>) (in 5% DMSO/H<sub>2</sub>O): 469.5 (19800), 290.5 (77200), 264 (35700). CD [ $\lambda_{\max}$  (nm), in 5% DMSO/H<sub>2</sub>O]: +298. <sup>1</sup>H NMR (500 MHz, *d*<sub>6</sub>-DMSO, ppm)  $\delta$  9.07 (d, *J* = 8.1 Hz, 2H), 8.90 (d, *J* = 8.2 Hz, 2H), 8.86 (d, *J* = 8.2 Hz, 2H), 8.41 (d, *J* = 8.3 Hz, 2H), 8.25 (m, 2H), 8.12 (t, *J* = 7.4 Hz, 2H), 7.98 (d, *J* = 4.4 Hz, 2H), 7.88 (t, 6H), 7.78 (d, *J* = 7.9 Hz, 2H), 7.6–7.53 (dd, 6H), 7.47 (dd, *J* = 4.8, 1.7 Hz, 2H), 7.37 (t, *J* = 6.5 Hz, 2H). <sup>13</sup>C NMR (126 MHz, *d*<sub>6</sub>-DMSO, ppm)  $\delta$  157.20 (s), 151.79 (s), 144.74 (s), 138.21 (s), 132.28 (s), 131.84 (s), 130.60 (s), 129.30 (s), 128.26 (s), 127.01 (s), 126.07 (s), 124.87 (s), 122.77 (s), 89.32 (s).

#### Synthesis of $\Delta$ -[Ru(bpy)<sub>2</sub>(*p*-PBE)](ClO<sub>4</sub>)<sub>2</sub> ( $\Delta$ -RM0627)

$\Delta$ -RM0627 was prepared using the method described above, but with  $\Delta$ -[Ru(bpy)<sub>2</sub>(*p*-BrPIP)](ClO<sub>4</sub>)<sub>2</sub> (130 mg, 0.125 mmol) instead of  $\Delta$ -[Ru(bpy)<sub>2</sub>(*p*-BrPIP)](ClO<sub>4</sub>)<sub>2</sub>. The yield was 41.7%. Calculated for C<sub>55</sub>H<sub>52</sub>Cl<sub>2</sub>N<sub>12</sub>O<sub>12</sub>Ru (%): C, 53.06; H, 4.21; N, 13.50. (Found (%): C 52.4, H 4.4, N 12.7). ESI-MS (in CH<sub>3</sub>CN, *m/z*): 809.3 ([M–2ClO<sub>4</sub>–H]<sup>+</sup>), 405.3 ([M–2ClO<sub>4</sub>]<sup>2+</sup>). UV–vis [ $\lambda$  (nm),  $\epsilon$  (M<sup>-1</sup> cm<sup>-1</sup>) (in 5% DMSO/H<sub>2</sub>O): 469.5 (19800), 290.5 (77200), 264 (35700). CD [ $\lambda_{\max}$  (nm), in 5% DMSO/H<sub>2</sub>O]: -298. <sup>1</sup>H NMR (500 MHz, *d*<sub>6</sub>-DMSO, ppm)  $\delta$  9.07 (d, *J* = 8.1 Hz, 2H), 8.90 (d, *J* = 8.2 Hz, 2H), 8.86 (d, *J* = 8.2 Hz, 2H), 8.41 (d, *J* = 8.3 Hz, 2H), 8.25 (m, 2H), 8.12 (t, *J* = 7.4 Hz, 2H), 7.98 (d, *J* = 4.4 Hz, 2H), 7.88 (t, 6H), 7.78 (d, *J* = 7.9

Hz, 2H), 7.6–7.53 (dd, 6H), 7.47 (dd,  $J = 4.8, 1.7$  Hz, 2H), 7.37 (t,  $J = 6.5$  Hz, 2H).  $^{13}\text{C}$  NMR (126 MHz,  $d_6$ -DMSO, ppm)  $\delta$  157.20 (s), 151.79 (s), 144.74 (s), 138.21 (s), 132.28 (s), 131.84 (s), 130.60 (s), 129.30 (s), 128.26 (s), 127.01 (s), 126.07 (s), 124.87 (s), 122.77 (s), 89.32 (s).

#### **The cellular distribution of A/A-RM0627 in HepG2 cells.**

HepG2 cells were resuspended in complete growth medium at a density of  $5 \times 10^4$  cells/mL, which were then treated with drugs and incubated for 24 h at 37 °C, unless otherwise stated. Cells were washed thrice in PBS, and then fixed and permeabilized simultaneously in 4% paraformaldehyde. Cell specimens were blocked overnight at 4°C with 3% (wt/vol) BSA and counter-stained with DAPI (0.5  $\mu\text{g}/\text{ml}$ ).<sup>1</sup> Cell morphology was observed by laser confocal microscope.

#### **Isothermal titration calorimetry (ITC) measurements.**

About 1.43 mL of *c-myc* G4 DNA solution was titrated with the isomer solution. A typical titration experiment consisted of 30 consecutive injections of 10  $\mu\text{L}$  volumes and a duration of 20 s each, with a 3 min interval between injections. Heats of dilution of the complex were determined by injecting the complex solution into buffer alone and the total observed binding heats were corrected for the heat of dilution.<sup>3</sup> The “MicroCal Origin” software program was used to determine and model site-binding that gave a good fit to the resultant data.

**CD spectra.** The oligonucleotide samples were dissolved in 5 mM Tris-HCl and 50 mM KCl (pH 7.2). The corresponding samples of *c-myc* DNA at a concentration of 100  $\mu\text{M}$  were dissolved. During the titration, aliquots (2  $\mu\text{L}$ ) of buffered DNA were

added to each cuvette to eliminate the absorbance of *c-myc* G4 DNA itself, following which, the solutions were mixed by repeated inversions. After the solutions were mixed for approximately 5 min, the CD spectra were recorded. The titration process was repeated until there was almost no change, which indicated that binding saturation had been achieved.<sup>4</sup> For each sample, at least three spectral scans were accumulated over the wavelength range of 200 – 600 nm at room temperature in a 1.0 cm path length cell at a scanning rate of 50 nm/min. The instrument was flushed continuously with pure evaporated nitrogen throughout the experiment.

**The binding mode of *A/A*-RM0627 with *c-myc* G-quadruplex DNA.** Automated docking studies were performed with three different docking algorithms, which were: 1) AutoDock 3.0 ('Lamarckian' genetic algorithm); 2) FlexX 1.10 (incremental construction algorithm, as implemented in Sybyl 6.8), and 3) GOLD 1.2 (i.e., the "Darwinian" genetic algorithm).<sup>2, 5</sup> As scoring is a very important second aspect of automated docking methodologies, it was decided to investigate the effect of rescoring – this is a process of reprioritization of the docking solutions (i.e., primarily ranked by the "native" scoring function implemented in the docking program) with an additional stand-alone scoring function.

**The nano-assembly of the *c-myc* G-quadruplex DNA induced by *A/A*-RM0627.** The mixed solution of DNA (50  $\mu$ M) and *A/A*-RM0627 (50  $\mu$ M) were incubated for three days. Then, the mixed solution of 100  $\mu$ L was removed to a copper wire mesh and naturally volatilized for 2 h. Images of the samples were captured by transmission electron microscopy (TEM; TECNAI 10). Next, a 10  $\mu$ L volume of the mixed solution



## 2.1 The ESI-MS spectra $\Lambda/\Delta$ -[Ru(bpy)<sub>2</sub>(p-PBE)](ClO<sub>4</sub>)<sub>2</sub>

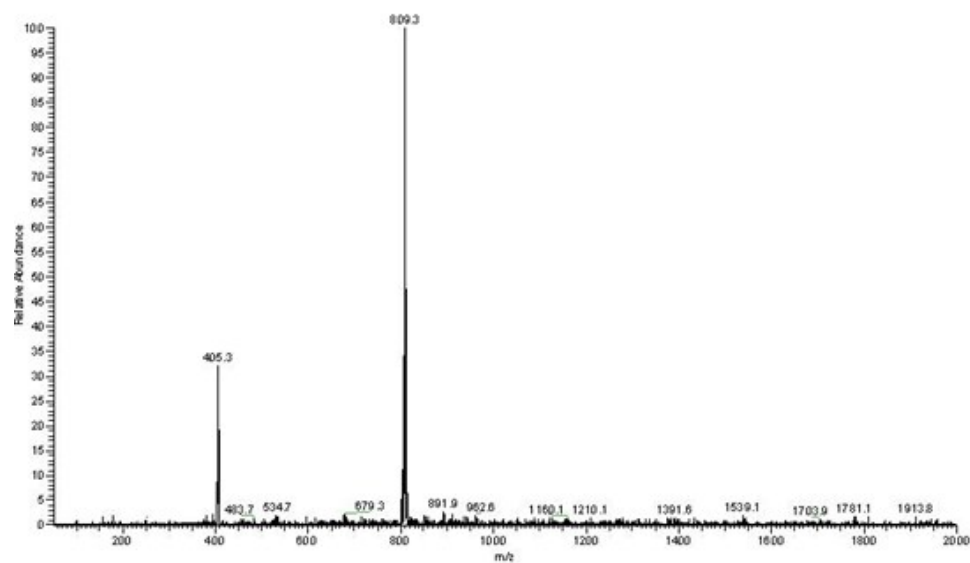

A

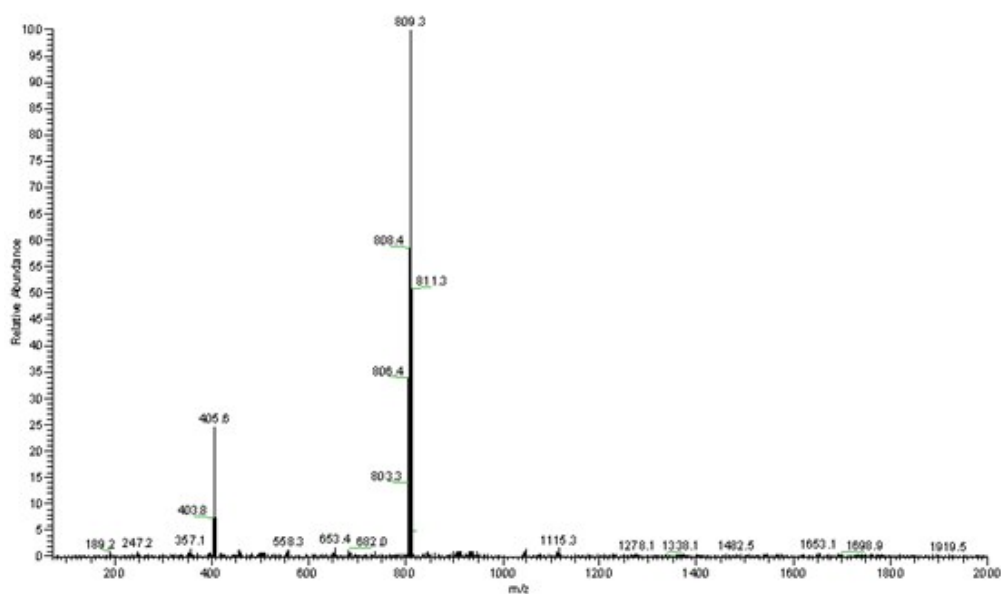

B

**FigureS1.** The ESI-MS spectra of chiral ruthenium(II) complexes  $\Lambda$ -RM0627 (A) and  $\Delta$ -RM0627 (B).

## 2.2 The <sup>1</sup>H NMR spectra $\Lambda/\Delta$ -[Ru(bpy)<sub>2</sub>(p-PBE)](ClO<sub>4</sub>)<sub>2</sub>

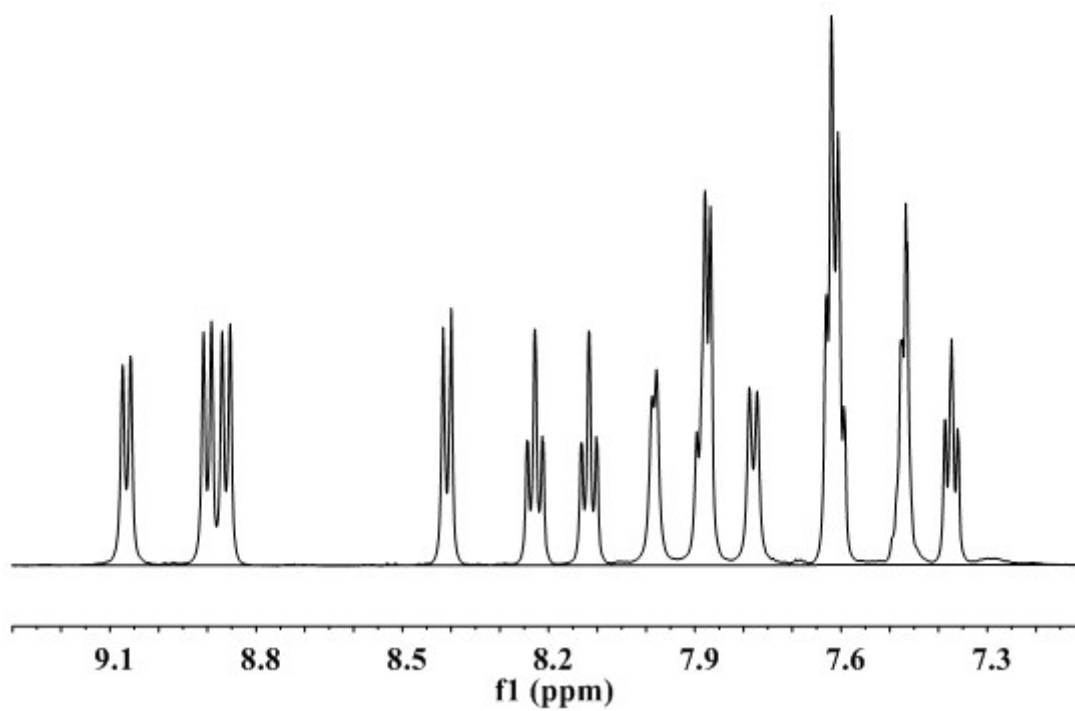

A

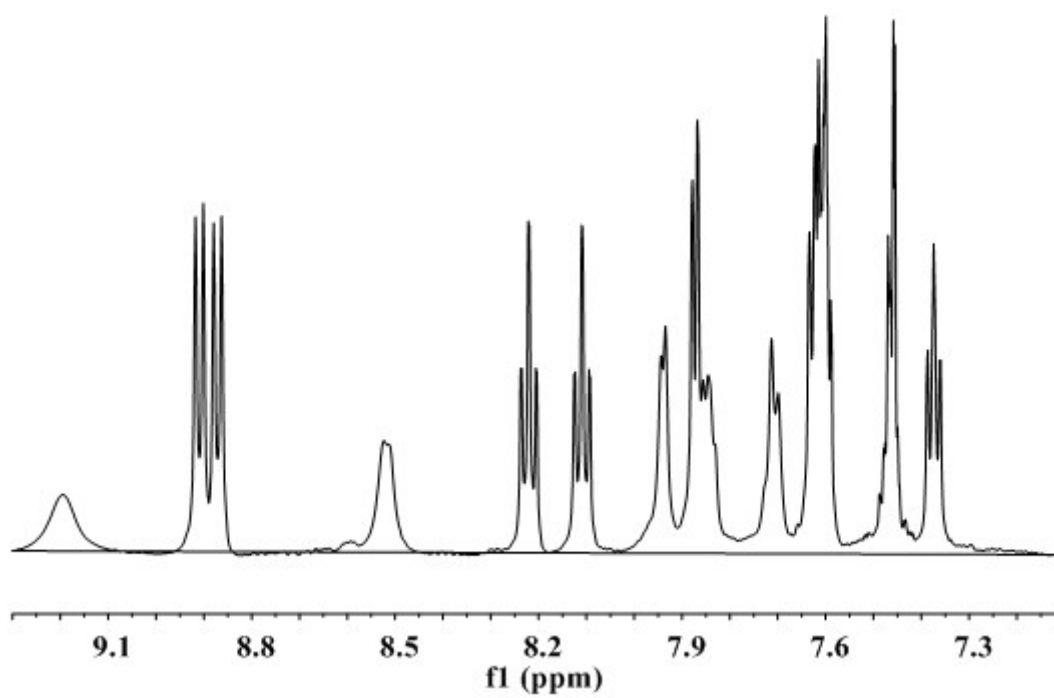

B

**FigureS2.** The  $^1\text{H}$  NMR spectra of chiral ruthenium(II) complexes  $\Delta$ -RM0627 (A) and  $\Delta$ -RM0627 (B).

2.3 The  $^1\text{H}$ - $^1\text{H}$  COSY spectra  $\Delta/\Delta$ -[Ru(bpy) $_2$ (*p*-PBE)](ClO $_4$ ) $_2$



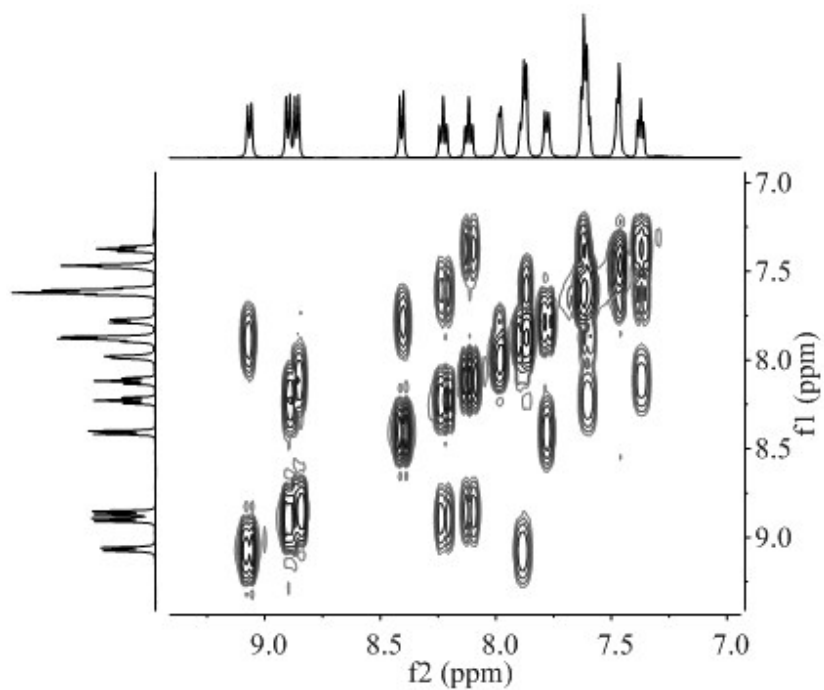

A

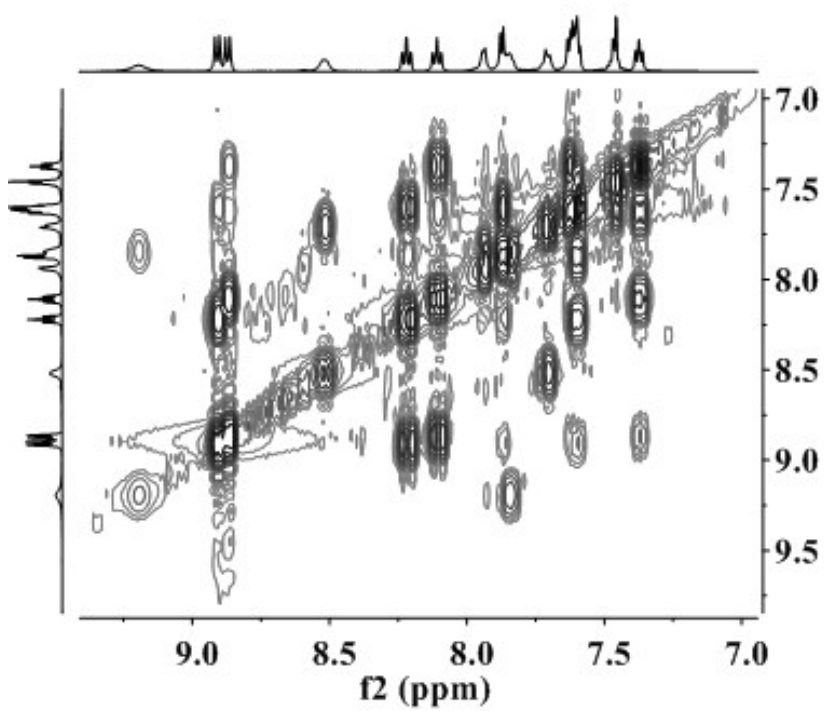

B

**FigureS3.** The  $^1\text{H}$   $^1\text{H}$  COSY spectra of chiral ruthenium(II) complexes *A*-RM0627 (A) and *A*-RM0627 (B).

Table 1 Number of conformations and the lowest binding energy of each docking mode.

| Docking Mode              | Number of conformations (%) | The lowest binding energy (kcal/mol) |
|---------------------------|-----------------------------|--------------------------------------|
| DNA- <i>A</i> -RM0627-DNA |                             |                                      |
| <b>a1</b>                 | <b>30</b>                   | <b>38.89</b>                         |
| <b>a2</b>                 | <b>15</b>                   | <b>39.21</b>                         |
| <b>a3</b>                 | <b>54</b>                   | <b>40.75</b>                         |
| DNA- <i>Δ</i> -RM0627-DNA |                             |                                      |
| <b>b1</b>                 | <b>78</b>                   | <b>38.82</b>                         |
| <b>b2</b>                 | <b>22</b>                   | <b>41.77</b>                         |

### 3. References

1. Ding, Y. Wu, Q., Zheng, K., An, L., Hu, X. and Mei, W. (2015) Imaging of the nuclei of living tumor cells by novel ruthenium(II) complexes coordinated with 6-chloro-5-hydroxypyrido [3,2-a]phenazine. *Rsc Adv.*, **5**, 63330-63337.
2. Wu, Q., Chen, T., Zhang, Z., Liao, S., Wu, X., Wu, J., Mei, W., Chen, Y., Wu, W., Zeng, L. *et al.* (2014) Microwave-assisted synthesis of arene ruthenium(II) complexes [(eta(6)-RC(6)H(5)) Ru(m-MOPIP)Cl]Cl (R = -H and -CH(3)) as groove binder to *c-myc* G4 DNA. *Dalton Trans.*, **43**, 9216-9225.

3. Xu, L., Chen, X., Wu, J., Wang, J., Ji, L. and Chao, H. (2015) Dinuclear Ruthenium(II) Complexes That Induce and Stabilise G-Quadruplex DNA. *Chem. - Eur. J.*, **21**, 4008-4020.
4. Chen, X., Wu, J.H., Lai, Y.W., Zhao, R., Chao, H. and Ji, L.N. (2013) Targeting telomeric G-quadruplexes with the ruthenium(II) complexes [Ru(bpy)(2)(ptpn)](2+) and [Ru(phen)(2)(ptpn)](2+). *Dalton Trans.*, **42**, 4386-4397.
5. Sun, H., Xiang, J., Gai, W., Liu, Y., Guan, A., Yang, Q., Li, Q., Shang, Q., Su, H., Tang, Y. and Xu, G. (2013) Quantification of the Na<sup>+</sup>/K<sup>+</sup> ratio based on the different response of a newly identified G-quadruplex to Na<sup>+</sup> and K<sup>+</sup>. *Chem. Commun. (Camb)*, **49**, 4510-4512.
